# Supplementary material for: A new search-and-rescue service in the Mediterranean Sea: a demonstration of the operational capability and an evaluation of its performance using real case scenarios
Source: Copernicus journal article supplement (doi:10.5194/nhess-2016-175), 2016-06-01
Supplement: Supplementary file [file nhess-2016-175-AC2-supplement.zip]

G. Coppini<sup>1</sup>, E. Jansen<sup>1</sup>, G. Turrisi<sup>1</sup>, S. Creti<sup>1</sup>, E. Y. Shchekinova<sup>1,2</sup>, N. Pinardi<sup>1,3</sup>, R. Lecci<sup>1</sup>, I. 5 Carluccio<sup>1</sup>, Y.V. Kumkar<sup>1</sup>, A. D’Anca<sup>1</sup>, G. Mannarini<sup>1</sup>, S. Martinelli<sup>1</sup>, P. Marra<sup>4</sup>, T. Capodiferro<sup>5</sup>, T. Gismondi<sup>5</sup>

<sup>5</sup> ITCG, Italian Coast Guard, Direzione Marittima di Bari

30 The Mediterranean Sea faces thousands of accidents and consequent search and rescue operations. Accidents are related to tourism and recreational activities along the Mediterranean coastlines, maritime commercial, transport and fishery operations and to the immigrations from Africa and south-eastern Mediterranean countries. The Italian Coast Guards and Italian Navy intervened in thousands of SAR operations in national Italian and international waters (e.g. 2.649 standard SAR operations which led to the rescue of 5.885 persons, and 938 SAR operations related to immigrants fluxes which led to the

**Formattato:** Tipo di carattere:(Predefinito)  
Times New Roman, Colore carattere:  
Automatico

| [rescue of 154.018 persons in 2015<sup>1\)</sup>](#)

The aim of OCEAN-SAR is to provide support to maritime authorities and operational centres (i.e. the Coast Guards) to [optimize](#) the strategy of search by reducing the extent of search area extension and increasing the probability of success of a rescue operation in case of a sea accident. In addition to maritime authorities also private users are interested to get support in SAR activities.

Two main categories of users can be identified: 1) The public authorities responsible at different levels for SAR emergencies management such as the Coast Guard; 2) Private users (i.e. maritime transport companies, yachters) that would like to start search and rescue of an object/person lost at sea from their boat. Private users might be even interested to search objects that the public authorities would not be responsible to search.

The SAR modelling tools are based on lagrangian modelling (Breivik and Allen, 2008) forced by wind and currents environmental fields.

Advances in high-resolution ocean operational forecast (Pinardi et al. 2003; Oddo et al. 2006; Tonani et al. 2008) for the Mediterranean Sea, nowadays delivered by the Copernicus Marine Environmental Monitoring Service (CMEMS) Mediterranean Monitoring and Forecasting Centre (MED-MFC), are available providing [each day](#) accurate hourly [frequency](#) forecasts [for the next five days and every week analysis of the last week](#). [Analyses are produced thanks to the](#) data assimilation system (Dobricic et al. 2004; Dobricic and Pinardi 2008) [which is](#) correcting the model results with observations (e.g. Sea Level Anomaly, Temperature and salinity profiles). [The MED-MFC analysis and forecasts can be used to force SAR models.](#)

## 2 The Leeway model description<sup>n</sup>

The leeway model (Breivik and Allen, 2008) uses an ensemble of drifting particles to model the movement of an object due to surface currents and wind. The motion of a particle  $n$  in this ensemble is described by the model equation:

$$d\vec{x} = [\vec{C}(\vec{x}, t) + \vec{L}(\vec{x}, t)]dt \quad (1)$$

with  $\vec{C}(\vec{x}, t)$  the surface current velocity and  $\vec{L}(\vec{x}, t)$  the wind-induced velocity or leeway. The latter is separated in a downwind component ( $L_d$ ) and crosswind component ( $L_c$ ) as:

$$\vec{L}(\vec{x}, t) = \begin{pmatrix} \cos\theta_w & -\sin\theta_w \\ \sin\theta_w & \cos\theta_w \end{pmatrix} \begin{pmatrix} \Omega_n L_c(\vec{x}, t) \\ L_d(\vec{x}, t) \end{pmatrix}$$

(2)

<sup>1</sup> Source of information: “Annual report of the operational activities of Italian Coast guard for 2015”

Microsoft Office User 6/10/16 18:04  
**Formattato:** Tipo di carattere:(Predefinito)  
Helvetica-Bold, Grassetto, Colore  
carattere: Colore

Microsoft Office User 6/10/16 18:08  
**Eliminato:** optimise

Microsoft Office User 31/8/16 16:58  
**Eliminato:** at the Mediterranean level

CMCC CMCC 7/10/16 11:42  
**Eliminato:** Analsys

Microsoft Office User 31/8/16 16:59  
**Eliminato:** also of objects in this area. The  
CMEMS MED-MFC modelling tools also include

Microsoft Office User 31/8/16 17:04  
**Formattato:** Titolo 1

Microsoft Office User 31/8/16 17:04  
**Eliminato:** n

Here  $\Omega_n = \pm 1$  is the intrinsic orientation of the particle and  $\theta_W$  the direction of the wind defined in an anti-clockwise direction with respect to the north. The components of the leeway  $L_i$  ( $i = c, d$ ) are parameterised as:

$$L_i(\vec{x}, t) = \left( a_i + \frac{\epsilon_{i,n}}{20} \right) |\vec{W}(\vec{x}, t)| + b_i + \frac{\epsilon_{i,n}}{2} \quad (3)$$

with  $\vec{W}(\vec{x}, t)$  the wind at 10 m height,  $a_i$  and  $b_i$  the so-called leeway-coefficients and  $\epsilon_{i,n}$  a per-particle perturbation. This perturbation is a random number drawn from a normal distribution with standard deviation  $\sigma_i$  and it represents the uncertainty on the  $a_i$  and  $b_i$  parameters. The result of this parameterisation is that the drift characteristics of an object can be described by the 6 object class parameters<sup>2</sup>  $a_d, b_d, \sigma_d, a_c, b_c$  and  $\sigma_c$ .

The values of the object class parameters have been determined experimentally (Allen and Plourde, 1999; Allen, 2005 for various types of objects, ranging from persons in various conditions to life-rafts and medium-size ships. The current implementation of the model defines a total of 64 classes and sub-classes.

Uncertainties on the wind and the ocean currents can be incorporated into the simulation by introducing an additional perturbation to the forcing fields. The uncertainty on the current forcing field is considered to be negligible compared to the uncertainty on the wind forcing. This is warranted by the fact that the ocean data have a higher spatial and temporal resolution. Moreover, the uncertainty on the effect of the wind forcing is further amplified by the uncertainty on the leeway itself. Therefore only the perturbation for the wind is taken into account.

$$\vec{W}(\vec{x}, t) \rightarrow \vec{W}(\vec{x}, t) + \vec{\epsilon}_{W,n} \quad (4)$$

The components of the perturbation  $\vec{\epsilon}_{W,n}$  are random variables drawn from a normal distribution, with standard deviation equal to the wind field uncertainty  $\sigma_W$ . At present no spatial or temporal correlations are taken into account for  $\sigma_W$ . New values for  $\vec{\epsilon}_{W,n}$  are calculated for every particle  $n$  at every model timestep.

The model is initialised by creating an ensemble of  $N = 500$  particles of a given object class. Their initial positions are distributed according to a two-dimensional normal distribution centred at the last

<sup>2</sup> For a small number of classes the crosswind coefficients have an additional dependency on the left/right of downwind orientation  $\Omega_n$ . In that case the crosswind coefficients become:

$$(a_c, b_c, \sigma_c) = \begin{cases} (a_l, b_l, c_l), & \Omega = -1 \\ (a_r, b_r, c_r), & \Omega = +1 \end{cases}$$

bringing the total number of object class parameters to 9.

CMCC CMCC 30/9/16 14:53

**Formattato:** Tipo di carattere:12 pt, Inglese (Stati Uniti)

CMCC CMCC 30/9/16 14:53

**Eliminato:** The uncertainty on the current forcing field is considered to be negligible compared to the uncertainty on the wind forcing, therefore only the perturbation for the wind is taken into account:

known position (LKP) and with a standard deviation corresponding to the radius of uncertainty. This radius is typically of the order of a few kilometres. The initial orientation of the particles,  $\Omega_n$ , is chosen randomly.

- 5 To obtain the particle trajectories and the final distribution, Eq. (1) is integrated from the initial to the final time using the midpoint method with a fixed-size timestep of 360 s. The possibility of particles changing their orientation, the so-called jibing, is taken into account by randomly changing the sign of  $\Omega_n$  after every timestep. The probability of a particle changing orientation is set to 4 % per hour (Allen, 2005), i.e. a particle has a 4/1000 chance of changing orientation at a given timestep.

### 3 Environmental forcing

- 10 The Leeway model in OCEAN-SAR system is forced by ocean currents data CMEMS MED-MFC and atmospheric wind data from ECMWF: these datasets are used for the calculation of the particles trajectories.

#### 3.1 CMEMS MED-MFC products

- 15 The OCEAN-SAR uses the ocean currents analysis and forecast from the CMEMS MED-MFC operational implementation of the NEMO model in the Mediterranean Sea (Tonani et al., 2008, Oddo et al., 2009, Tonani et al., 2009). The fields used are currents in meridional and zonal direction at multiple depth level. The name of the CMEMS MED-MFC product used is MEDSEA\_ANALYSIS\_FORECAST\_PHY\_006\_001. Currents are provided with hourly resolution on a 1/16 degree (i.e., 6 kilometers in the meridional direction) mesh on 72 vertical levels. Three type of products are used by OCEAN-SAR:

- 20
- 1) The 10-days forecasts produced every day originating from the 12:00 UTC analysis/simulation
  - 2) The 1-week analysis produced every Tuesday from the 12:00 UTC analysis. Analyses include data assimilation (Dobricic & Pinardi 2008, Dobricic et al., 2007)
  - 25 3) The 1-day simulations produced every day (except Tuesday) from the 12:00 UTC analysis/simulation, do not include data assimilation.

#### 3.2 ECMWF products

- 30 The wind forcing at 10 meters height is provided by the IFS model operated by the ECMWF. The model outputs are available with 3-hourly resolution for the first 3 days after the analysis, the horizontal resolution is 1/8 degree (12.5 km), and the forecasts refer to the 12:00 UTC analysis.

CMCC CMCC 7/10/16 11:47

Eliminato: .

Microsoft Office User 31/8/16 17:05

Eliminato: employed

Microsoft Office User 31/8/16 17:04

Eliminato: employed

CMCC CMCC 30/9/16 17:22

Eliminato: 7.5 miles in the meridional direction

4. The OCEAN-SAR operational system

The core of OCEAN-SAR runs on the CMCC super-computer. The OCEAN-SAR system is running in operational mode since June 2014. The System is available on web and mobile application and has been configured so that registered users can submit the jobs. The service is freely available on the web and free of charge.

The OCEAN-SAR logical architecture is shown in Figure 1, and consists of the following components:

- User Interfaces (UIs) for the web and mobile client devices;
- Sea Situational Awareness (SSA) platform (web portal, map service and message broker);
- The Complex Data Analysis Module (CDAM) in the computing centre.

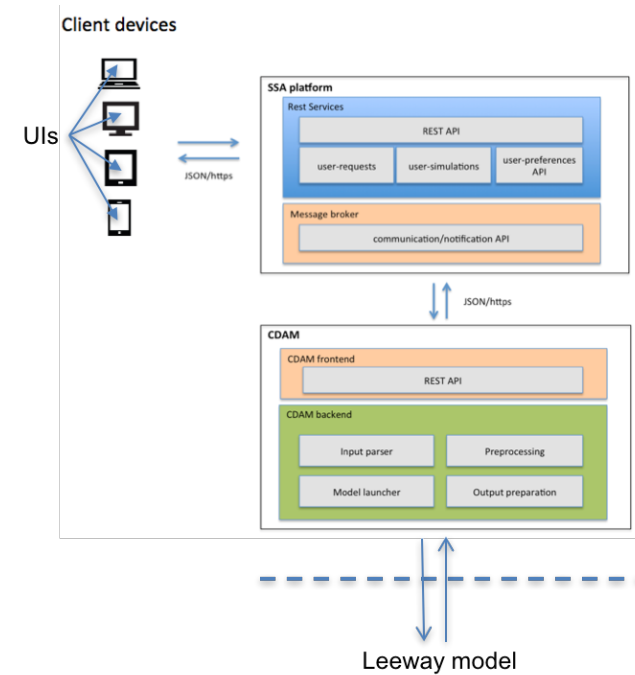

CMCC CMCC 30/9/16 17:23  
**Eliminato:** system and specifically on the part called Okeanos dedicated to the maritime related services of CMCC

Microsoft Office User 6/10/16 17:36  
**Formattato:** Colore carattere: Automatico

CMCC CMCC 7/10/16 11:52  
**Eliminato:** Figure 1

CMCC CMCC 30/9/16 17:23  
**Eliminato:** <#>Data pre-processing system; -

Unknown  
**Formattato:** Tipo di carattere:12 pt, Colore carattere: Automatico

Microsoft Office User 4/10/16 08:02

**Eliminato:**

**Figure 1: OCEAN-SAR high-level architecture describing the main components of OCEAN-SAR (UIs on client devices, SSA platform, CDAM, Leeway model).**

Only the relevant components of the system will be described in this paper, for a comprehensive description of the SSA platform, CDAM and their components see Mannarini et al. (2016).

All the relevant information provided by the users through the UIs (e.g. LKN, duration of the simulation) are transferred through a stream of data using the JavaScript Object Notation (JSON). This stream of data is first passed to the SSA platform through the Message Broker and then to the CDAM again through the Message Broker.

All the messages are exchanged by the components using the JSON format. The communication and the data exchange between the client devices and the SSA platform via the Representational State Transfer (REST) web services established by means of the Message Broker component that receives and forwards the requests to the CDAM hosted on the computational cluster at CMCC (Figure 2). The Message Broker is capable of store, in a database (grey cylinder in Figure 2) the # of request per user in order to avoid simultaneous submissions by the same user.

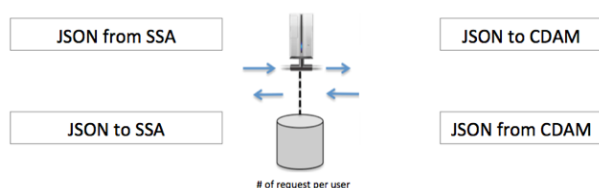

**Figure 2: Message Broker main functionalities are presented consisting of the exchange of messages between the SSA platform and the CDAM.**

The OCEAN-SAR pre-processing shell script parses the input JSON string in order to obtain the values of parameters required by the model to run the simulation. The parameters names and default values are listed in Table 3 of Appendix 1. The CDAM, before running the simulation, checks the data availability for the defined domain and simulation period. The wind data are used only if the 'depth' argument is '1', for the sub-surface simulations no wind is used. According to the 'simulation time' argument the current and wind data are selected. The NetCDF files are extracted into a specific location of the file system where a folder is created for each simulation. The depth slab at a required depth is made by using NetCDF Operators (NCO) utilities. The data concatenation is performed across the time variable.

The wind and current data at sea are extrapolated the ocean data towards the coast using a procedure called SeaOverLand (De Dominicis et al, 2013; Mannarini et al, 2016), which performs an extrapolation

Microsoft Office User 6/10/16 17:36  
Formattato: Tipo di carattere: Times New Roman, Grassetto  
CMCC CMCC 7/10/16 11:52  
Eliminato: 1  
Microsoft Office User 4/10/16 08:02  
Formattato: testo 1, Interlinea: 1,5 righe

Microsoft Office User 4/10/16 08:03  
Eliminato: JavaScript Object Notation (  
Microsoft Office User 4/10/16 08:03  
Eliminato: )  
Microsoft Office User 4/10/16 08:03  
Eliminato: m  
Microsoft Office User 4/10/16 08:03  
Eliminato: broker  
Microsoft Office User 4/10/16 08:03  
Eliminato: Okeanos  
CMCC CMCC 7/10/16 11:52  
Eliminato: Figure 2

Microsoft Office User 6/10/16 17:42  
Formattato: Tipo di carattere: 12 pt, Colore carattere: Automatico, Inglese  
Microsoft Office User 6/10/16 17:42  
Formattato: Tipo di carattere: 12 pt, Inglese (Regno Unito)  
Microsoft Office User 6/10/16 17:42  
Formattato: Tipo di carattere: 12 pt, Colore carattere: Automatico, Inglese  
Microsoft Office User 4/9/16 12:30  
Formattato: Nessun controllo righe isolate, Non regolare lo spazio tra testo asiatico e in alfabeto latino, Non regolare lo spazio tra testo asiatico e caratteri  
Microsoft Office User 4/10/16 08:04  
Eliminato: system

of the original data considering for each cell grid point an average of the 8 nearest values and then doing different iterations. This procedure optimally fills, for the currents, the gaps that remain between the ocean model domain and the high-resolution coastline. Moreover also the wind data over the ocean model domain are extrapolated over the land point to ensure that the simulation is performed with data of wind over the ocean and is not affected by wind over land. Then a high-resolution mask is applied to remove the part of the extrapolated ocean data on land. The initial positions are randomly generated for LKP in a circle which radius is set-up by the user, before passing to the drift trajectory module of OCEAN-SAR. For every step an error management procedure is implemented that may cause the processing to stop, killing the job, and will post an error message with details to the UI. After the Leeway model runs successfully, the output data are coded in plain text ASCII format and written in the output directory corresponding to the number of the simulation user request. The CDAM checks for the size of the output data and subsequently, if it is not empty, stores the output in JSON format as a new file. The communication via REST web services is established through the Message Broker, a component of the SSA platform that receives the requests and forwards them to the CDAM hosted on the computational cluster. The model is executed on the server and returns the results to the user via the message broker. The Message Broker is a unique component hosted by the SSA Platform. As illustrated in fig. 1 it is responsible for the communication both among client devices and SSA platform and between CDAM and SSA platform. The CDAM receives input data from the SSA platform through the Message Broker and send back the results produced by the model to the SSA platform through the Message Broker.

All the user requests as well as the results of the simulations are stored in a database by a component of the SSA platform, which ensure the data persistency (Figure 3). This component is used by the OCEAN-SAR for instance to store and retrieve previously done simulations.

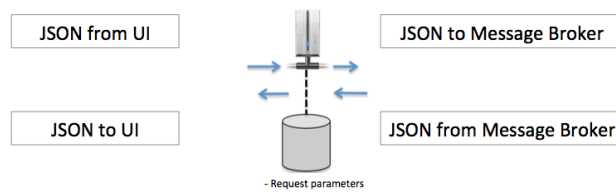

**Figure 3: SSA component responsible for data persistence and for the exchange of information between the UI and the Message Broker.**

|                                                                                                                                                                                                                                                                                                                                                                                                  |
|--------------------------------------------------------------------------------------------------------------------------------------------------------------------------------------------------------------------------------------------------------------------------------------------------------------------------------------------------------------------------------------------------|
| Microsoft Office User 31/8/16 17:23                                                                                                                                                                                                                                                                                                                                                              |
| <b>Formattato:</b> Tipo di carattere:(Predefinito)<br>Times New Roman                                                                                                                                                                                                                                                                                                                            |
| Microsoft Office User 31/8/16 17:16                                                                                                                                                                                                                                                                                                                                                              |
| <b>Eliminato:</b> The Fortran interpolation procedure called SeaOverLand is carried for the extrapolate data near to the coast. Similar pre-processing procedure is completed for the wind by the Data Pre-processing system. Then the file is created dynamically and fetched to the lwseed executable code that creates initial positions of an ensemble of drifters in the leeway input file. |
| Microsoft Office User 4/9/16 12:30                                                                                                                                                                                                                                                                                                                                                               |
| <b>Formattato:</b> Tipo di carattere:(Predefinito)<br>Times New Roman, 12 pt                                                                                                                                                                                                                                                                                                                     |
| Microsoft Office User 31/8/16 17:23                                                                                                                                                                                                                                                                                                                                                              |
| <b>Eliminato:</b> For every step an error management procedure is implemented that for the moment being will kill the job ad give the message to the UI.                                                                                                                                                                                                                                         |
| Microsoft Office User 4/10/16 08:05                                                                                                                                                                                                                                                                                                                                                              |
| <b>Eliminato:</b> system                                                                                                                                                                                                                                                                                                                                                                         |
| Microsoft Office User 4/9/16 12:30                                                                                                                                                                                                                                                                                                                                                               |
| <b>Formattato:</b> Tipo di carattere:(Predefinito)<br>NimbusSanL-Regu, 11 pt                                                                                                                                                                                                                                                                                                                     |
| Microsoft Office User 4/10/16 08:05                                                                                                                                                                                                                                                                                                                                                              |
| <b>Eliminato:</b> Okeanos                                                                                                                                                                                                                                                                                                                                                                        |
| Microsoft Office User 4/10/16 08:06                                                                                                                                                                                                                                                                                                                                                              |
| <b>Eliminato:</b> On Okeanos t                                                                                                                                                                                                                                                                                                                                                                   |
| Microsoft Office User 5/10/16 11:37                                                                                                                                                                                                                                                                                                                                                              |
| <b>Formattato:</b> Tipo di carattere:Non Corsivo                                                                                                                                                                                                                                                                                                                                                 |
| Microsoft Office User 5/10/16 11:37                                                                                                                                                                                                                                                                                                                                                              |
| <b>Formattato:</b> Tipo di carattere:                                                                                                                                                                                                                                                                                                                                                            |
| CMCC CMCC 7/10/16 11:52                                                                                                                                                                                                                                                                                                                                                                          |
| <b>Eliminato:</b> Figure 3                                                                                                                                                                                                                                                                                                                                                                       |

Thanks to this component, each user can visualize at any time the results of previously performed simulations and view the parameters used to run the simulation.

The data flow in [Figure 4](#), shows how the messages are exchanged in JSON format among the different components via REST web services.

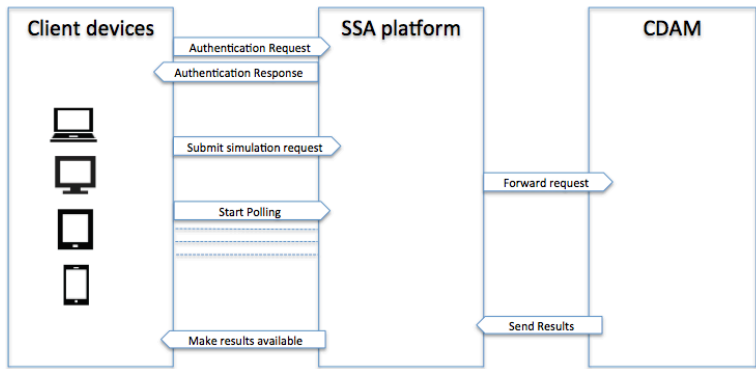

**Figure 4: Data flow among OCEAN-SAR components**

On [the server](#) the model is executed using Simple Linux Utility for Resource Management (SLURM) and the output are produced in ASCII format. The [CDAM \(output preparation component\)](#) converts the ASCII output data into JSON format in order to send back to [the SSA Platfor](#) (see [Figure 2](#)). The CDAM then sends the output to Message broker. In the meanwhile, client applications retrieve the results by polling for their availability, checking the content, and extracting the information required for the visualization. After completion of the loop the results are provided to the user via graphically displayed fields, [in particular, the particles and their trajectory are presented on the map respectively as yellow and black circles making use of Google shapes<sup>3</sup> and the currents are presented overlaying tiles provided by a WMS service.](#)

#### 4.1 Web and mobile applications

The web and mobile applications (iOS and Android) provide the access for the user through their user interfaces. The web application has been adapted for use on mobile devices (tablet and mobile phone) and app are available on the Apple and Android stores as free app.

<sup>3</sup> <https://developers.google.com/maps/documentation/javascript/shapes>

CMCC CMCC 7/10/16 11:52

Eliminato: Figure 4

Microsoft Office User 4/10/16 08:07

Eliminato: Okeanos

Microsoft Office User 4/10/16 08:07

Eliminato: system

Microsoft Office User 4/10/16 08:07

Eliminato: CDAM

CMCC CMCC 7/10/16 11:52

Eliminato: Figure 2

Microsoft Office User 5/10/16 11:59

Eliminato: .



The User Interface (UI) allows setting the parameters of the simulation, submitting requests and displaying the results of simulations on a map. The version of the UI presented in this paper is referenced as OCEAN-SAR ver 1.1 and dated May 2016. The configurable parameters are shown in Figure 5. The parameters can be grouped as follows:

- General parameters (simulation name, object category);
- Last known position (start position, and start date);
- Simulation duration;
- Forecasting system (wind and currents models);
- Display settings (environmental fields on/off);

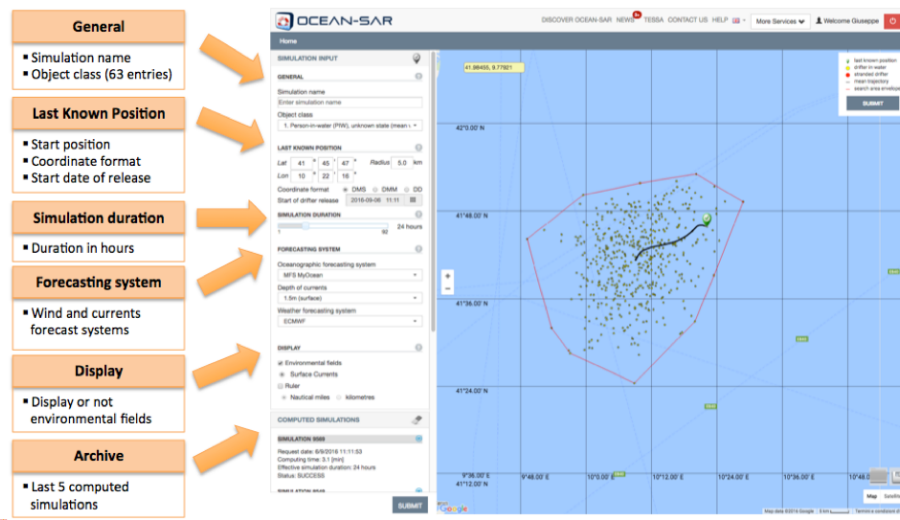

**Figure 5:** The Parameters of Simulation displayed on the UI are available on the left side of the UI. The boxes on the left side of the figure describe the different parameters.”

The meaning of each set of parameters is explained (see Figure 6) through a yellow box that appears on the UI after a click of the mouse.

CMCC CMCC 7/10/16 11:52  
Eliminato: Figure 4Figure 5

Microsoft Office User 4/9/16 12:39  
Eliminato: , end position,

Microsoft Office User 4/9/16 12:39  
Eliminato: , end date

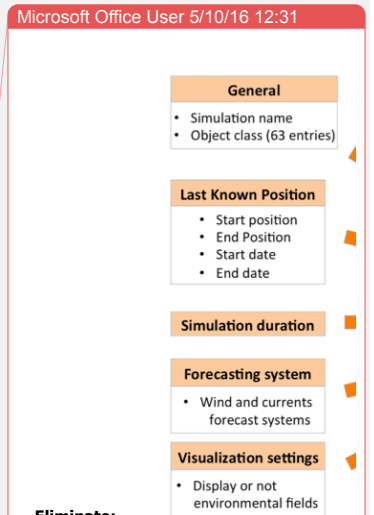

Eliminato:

Unknown  
Formattato: Tipo di carattere:

CMCC CMCC 7/10/16 11:52  
Eliminato: 55

Microsoft Office User 6/10/16 17:54  
Eliminato: Parameters of Simulation displayed on the UI

CMCC CMCC 7/10/16 11:52  
Eliminato: Figure 5 - Figure 5 - Figure 6 - Figure 6 - Figure 6



The results of a simulation can be displayed in the UI in two ways: with or without the magnitude of environmental fields (Figure 7).

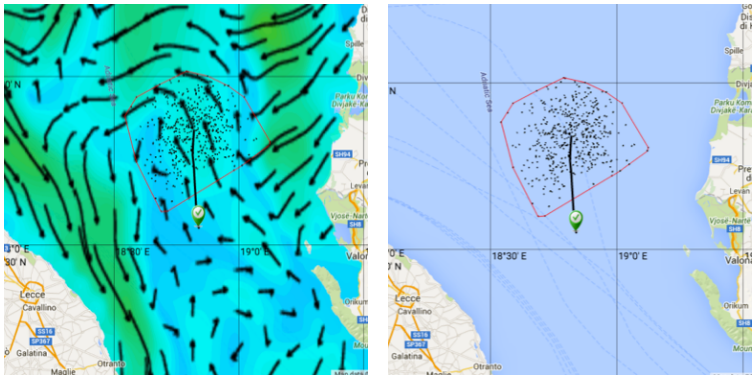

Figure 7: display of the simulation results with environmental fields (left) and without environmental fields (right).

5

The UI (Figure 8) visualizes the following output/results of the model:

- Drifters final positions (yellow or red markers);
- Mean trajectory drift (black curve);
- Drifters stranded along the coast line (red markers);
- Red contour line around the drifters, a convex hull that identified the search area.

10

CMCC CMCC 7/10/16 11:52  
Eliminato: Figure 6Figure 6Figure 7

CMCC CMCC 7/10/16 11:52  
Eliminato: 77

CMCC CMCC 7/10/16 11:52  
Eliminato: Figure 7Figure 8

Microsoft Office User 4/10/16 11:44  
Eliminato: .

Microsoft Office User 4/10/16 11:44  
Formattato: Tipo di carattere:12 pt, Inglese (Regno Unito)

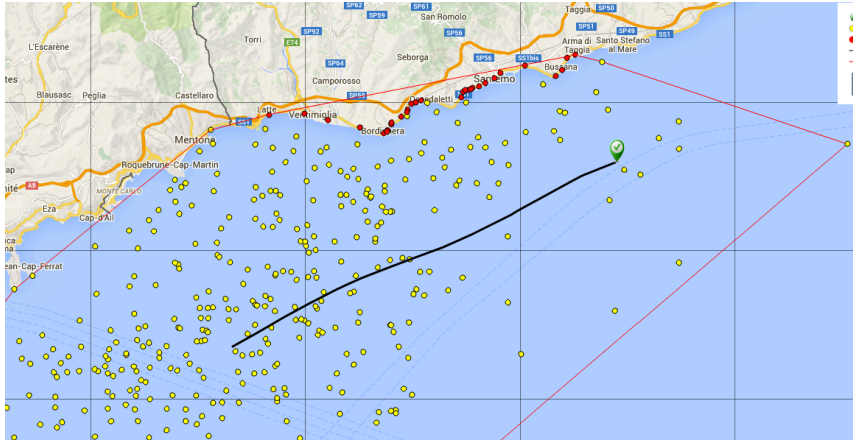

Figure 8: detailed visualization of the output of the model

## 5 Real case scenarios

5 OCEAN-SAR has been validated by reconstructing real case scenarios (accidents and field exercises) using information provided by the Italian Coast Guard. A selection of these real-case scenarios is presented in this section. Environmental fields used in the validations exercises have been the surface currents analysis provided by CMEMS MED-MFC and the wind analysis provided by ECMWF, both described in paragraph 3.1.

10 The Italian Coast Guard provided the information of 5 past events (Table 1) with different characteristics presented in the next sub-sections from 5.1 to 5.5. Last section 5.6 provides a discussion on each validation case.

### 15 5.1 Field exercise in Reggio Calabria waters

The field exercise in Reggio Calabria waters involved two different types of objects:

- Raft, (here called Calabria#1)
- Search and rescue dummy, (here called Calabria#2)

|                                                                                                                                                          |
|----------------------------------------------------------------------------------------------------------------------------------------------------------|
| CMCC CMCC 7/10/16 11:52                                                                                                                                  |
| Eliminato: 88                                                                                                                                            |
| Microsoft Office User 4/10/16 12:05                                                                                                                      |
| Eliminato: -                                                                                                                                             |
| Microsoft Office User 4/10/16 12:07                                                                                                                      |
| Eliminato: 6                                                                                                                                             |
| Microsoft Office User 4/10/16 11:59                                                                                                                      |
| Eliminato: :                                                                                                                                             |
| Microsoft Office User 4/10/16 12:05                                                                                                                      |
| Formattato: Tipo di carattere:12 pt,                                                                                                                     |
| Microsoft Office User 4/10/16 12:02                                                                                                                      |
| Formattato: Struttura + Livello: 2 + Stile numerazione: 1, 2, 3, ... + Comincia da: 1 + Allineamento: A sinistra + Allinea a: 0 cm + Rientra di: 0,63 cm |
| Microsoft Office User 4/10/16 12:03                                                                                                                      |
| Eliminato: Field                                                                                                                                         |
| Microsoft Office User 4/10/16 12:02                                                                                                                      |
| Formattato: Normale, Nessun elenco puntato o numerato                                                                                                    |
| Microsoft Office User 4/10/16 12:18                                                                                                                      |
| Formattato: Puntato + Livello: 2 + Allinea a: 1,9 cm + Rientra di: 2,54 cm                                                                               |
| Microsoft Office User 27/9/16 09:03                                                                                                                      |
| Eliminato: Search and rescue dummy                                                                                                                       |
| Microsoft Office User 27/9/16 09:03                                                                                                                      |
| Eliminato: Raft                                                                                                                                          |

The Raft and the dummy used in the exercise are presented in Figure 9.

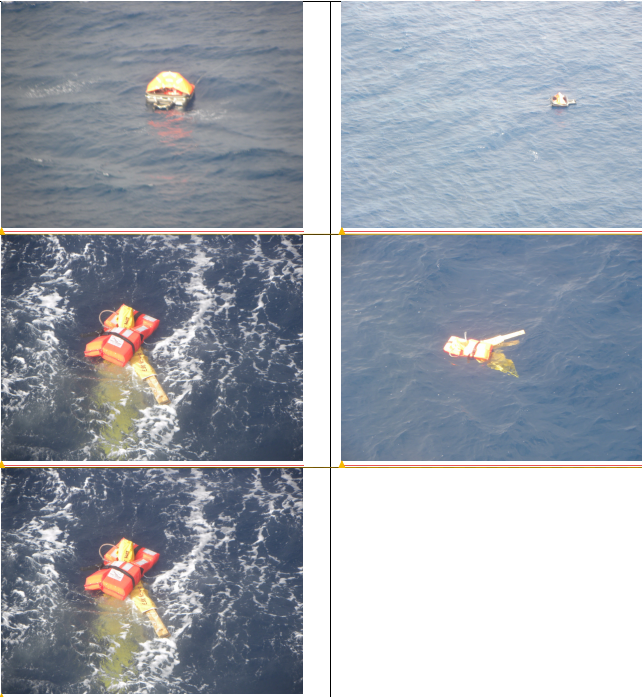

**Figure 9:** Photos of the dummy (Calabria#1) and raft (Calabria#2) used by Italian Coast Guard in the Calabria exercise.

For the raft used in this field exercise there was not an exact correspondent type of object in the IAMSAR manual (IMO, 2016) and therefore, following the indications by the Italian Coast Guard, a “shallow ballast with no drogue” raft was used for the simulation. For the dummy the type of object called “Person in the water (PIW), unknown state (mean value)” was used. The time and positions recorded for the objects are reported in table 1 (Calabria#1 for the Raft and Calabria#2 for the Dummy).

**5.2 Commercial fishing vessel used as a migrant ship.**

CMCC CMCC 7/10/16 11:52

Eliminato: Figure 9

Unknown

Formattato: Tipo di carattere:12 pt

Microsoft Office User 4/10/16 12:05

Eliminato: Commercial fishing vessel used as a migrant ship -

Microsoft Office User 6/10/16 17:33

Formattato: Tipo di carattere:12 pt,

Microsoft Office User 6/10/16 17:33

Formattato: Tipo di carattere:Grassetto

In this case the commercial fishing vessel with on board many migrants was simulated using the type of object "Commercial fishing vessel (14-30m) Troller" which was the correspondent object in the IAMSAR manual. The boat was found by the Italian Coast Guard at 00:40 UTC of the day 1 December 2013 (Table 1), the sea state was rough (more than 6m of waves height) and the  
5 the boat was drifting with failed engine, there was no possibility of immediate rescue and the ship was reached one day later when the sea state was better and allowed the transshipping of the migrants. The transshipment started at 12:05 UTC on 2 December 2013 at after 36 hours of drift in the new position where the vessel was found (Table 1). The time and positions recorded for the ship are reported in Table 1 (Migrantship#1).

### 5.3 Sixty meters long ship used as migrant ship

A ship 60 meters long was transporting immigrants who were rescue and transhipped. After the immigrant transshipment it was not possible to tow the ship, therefore it was left drifting. The position was recorded through successive sightings and this data is used for the validation of OCEAN-SAR. The  
15 length of the ship was approximately 60 meters, and there is not a specific correspondent type of object in the IAMSAR manual. The most similar ship type is the coastal freighter, which is used in the simulation of this paper. The time and positions recorded for the ship are reported in table 1 (Migrantship#2).

### 5.4 Small boat

On the 11th of December 2014 at 18.00 UTC a person on board of a small boat started drifting along the Italian coast of Apulia region (position given in Table 1). The location and time have been reconstructed based on the information provided by the person on board and are expected to be quite accurate (error estimated to be less than 1 nm and less than 2 hours). After 2 days, at 09:05 UTC on 13 December  
25 2014, the person was found alive on his boat in the position reported in table 1. The type of object in the IAMSAR manual that best fit with the real boat is skiff V hull smaller than 6 metres. The time and positions recorded for the boat are reported in table 1 (Small Boat).

### 5.5 Person at sea lost from a ferry

A person fell overboard from a ferry between 20:30 on the 11 July 2013 and the 23.30 UTC. The body of the person was found at 10:30 of the 12 July 2013 at the position reported in Table 1. In this case the last known position used in the simulation performed with OCEAN-SAR follows the AIS path corresponding to the positions of the ship during the time the person might have fallen overboard. The  
30 time and positions recorded for the Ferry are reported in table 1 (Ferry).

Microsoft Office User 4/10/16 13:03

Eliminato: LAT 38°08' N- LON 018°21'E

Microsoft Office User 4/10/16 13:04

Eliminato: the position 38°39'6"N, 018°21'E

Microsoft Office User 4/10/16 12:06

Formattato: Normale, Nessun elenco puntato o numerato

Microsoft Office User 4/10/16 12:06

Eliminato: 60

Microsoft Office User 4/10/16 12:06

Formattato: Tipo di carattere:Grassetto

Microsoft Office User 4/10/16 12:06

Formattato: Tipo di carattere:Grassetto

Microsoft Office User 4/10/16 12:06

Formattato: Normale, Nessun elenco puntato o numerato

Microsoft Office User 4/10/16 13:05

Eliminato: from the position 40°00'55"N 018°26'10"E

Microsoft Office User 4/10/16 13:06

Eliminato: 39°29'N 018°12'E

Microsoft Office User 4/10/16 12:06

Formattato: Tipo di carattere:Grassetto

Microsoft Office User 4/10/16 12:06

Formattato: Normale, Nessun elenco puntato o numerato

Microsoft Office User 4/10/16 13:08

Eliminato: g

Microsoft Office User 4/10/16 13:09

Eliminato: LAT 39° 54'.716 N LON 010° 06'.294 E

Microsoft Office User 4/10/16 12:12

Formattato: Spazio Prima: Automatico, Dopo: Automatico

Microsoft Office User 4/10/16 12:12

Eliminato: ... [1]





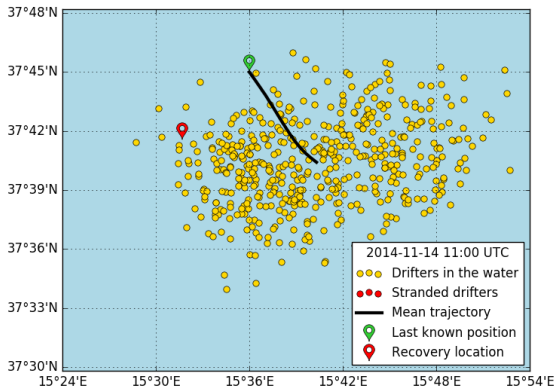

Figure 10; results of the “Calabria1” simulation done using OCEAN-SAR showing the positions (yellow points) of the particles at the end of the simulation 11:00 UTC of 14 November 2014. The red place-mark indicates the position in which the raft was collected. The green place-mark represent the position in which the raft was launched at sea and started drifting. The black line shows the mean trajectory of the simulated particles. During the exercise the wind speed ranged from approximately 3 to 10 m/s, predominantly in the south-southwest direction.

### 5.6 Discussion on each validation case

In the reconstruction of the Calabria1 (Figure 10) case the final position of the simulated drifters shows a partial agreement with the observation: the raft drifted south west and its final position after 13 hours at sea is contained in the area identified by the OCEAN-SAR system but the simulation shows an area more shifted eastward.

CMCC CMCC 7/10/16 11:52
Eliminato: 109

Microsoft Office User 27/9/16 09:05
Eliminato: dummy

Microsoft Office User 27/9/16 09:04
Eliminato:

Microsoft Office User 27/9/16 09:05
Eliminato: dummy

Microsoft Office User 4/10/16 12:16
Formattato: Tipo di carattere:Grassetto

CMCC CMCC 7/10/16 11:52
Eliminato: Figure 10Figure 8FigureFigure 9

Microsoft Office User 27/9/16 09:05
Eliminato: dummy

Microsoft Office User 27/9/16 09:12

Eliminato:
Unknown
Formattato: Tipo di carattere:Grassetto, Colore carattere: Colore 1



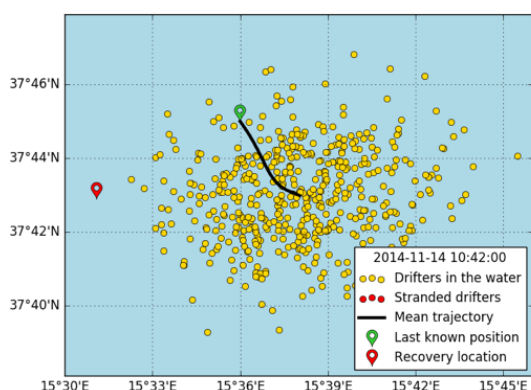

**Figure 11:** results of the “Calabria2” simulation done using OCEAN-SAR showing the positions (yellow points) of the particles at the end of the simulation 10:40 UTC of 14 November 2014. The red place-mark indicates the position in which the raft was collected. The green place-mark represent the position in which the dummy was launch at sea and start drifting. The black line shows the mean trajectory of the launched particles. During the exercise the wind speed ranged from approximately 3 to 10 m/s, predominantly in the south-southwest direction.

In the reconstruction of the Calabria2 (Figure 11) case the final position of the simulated drifters shows a partial agreement with the observation: the dummy drifted westward and its final position after 13 hours at sea is just outside the area identified by OCEAN-SAR system while the simulation shows an area more shifted eastward. OCEAN-SAR system does not show appreciable differences between the search and rescue raft simulated in Calabria1 and the dummy simulated in Calabria2. In reality the dummy moved westward faster than the raft.

Microsoft Office User 27/9/16 09:12  
Formattato: Normale

CMCC CMCC 7/10/16 11:52  
Eliminato: 1110

CMCC CMCC 7/10/16 11:52  
Eliminato: Figure 11Figure 9Figure 10

Microsoft Office User 27/9/16 09:06  
Eliminato: raft

Microsoft Office User 27/9/16 09:06  
Eliminato: dummy

Microsoft Office User 27/9/16 09:06  
Eliminato: raft

Microsoft Office User 27/9/16 09:07  
Eliminato: raft

Microsoft Office User 27/9/16 09:08  
Eliminato: dummy

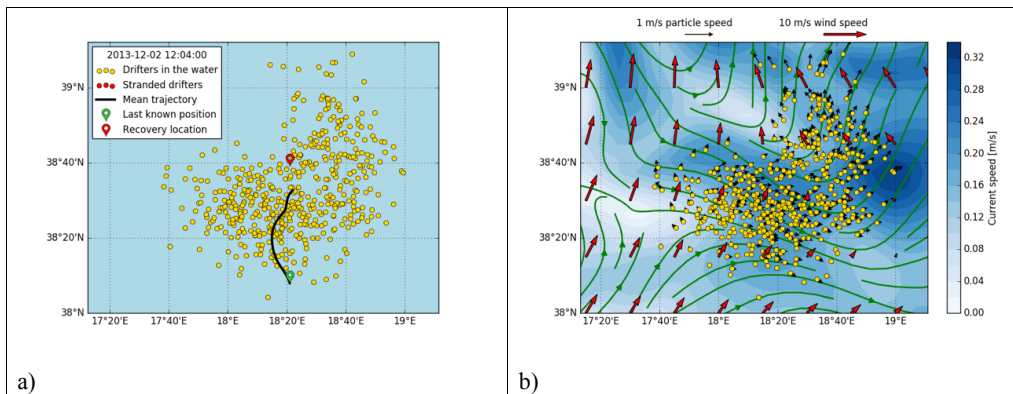

**Figure 12:** a) results of the “migrantship1” simulation done using OCEAN-SAR showing the positions (yellow points) of the particles at the end of the simulation 12:05 UTC of 2<sup>nd</sup> December 2013. The red place-mark indicates the position in which the ship was found. The green place-mark represent the position in which the ship was found and start drifting. The black line shows the mean trajectory of the launched particles; b) for each position of the drifters (yellow points) little black arrows indicates the direction and speed of their movement. Green streamlines indicate current direction and colored background shows their magnitude (white=low, blue=high). The wind field is shown by the red vectors.

In the reconstruction of the migrantship1 case (Figure 12, a and b) the final position of the simulated drifters is in good agreement with the observations: the ship drifted northward and its final position after approximately 12 hours is inside the area identified by the OCEAN-SAR system. Figure 12b presents the fields of wind and currents and the mean velocity of for each of the particles.

CMCC CMCC 7/10/16 11:52  
Eliminato: 121011

CMCC CMCC 7/10/16 11:52  
Eliminato: Figure 12Figure 10Figure 11

Microsoft Office User 5/10/16 11:46  
Eliminato: 1

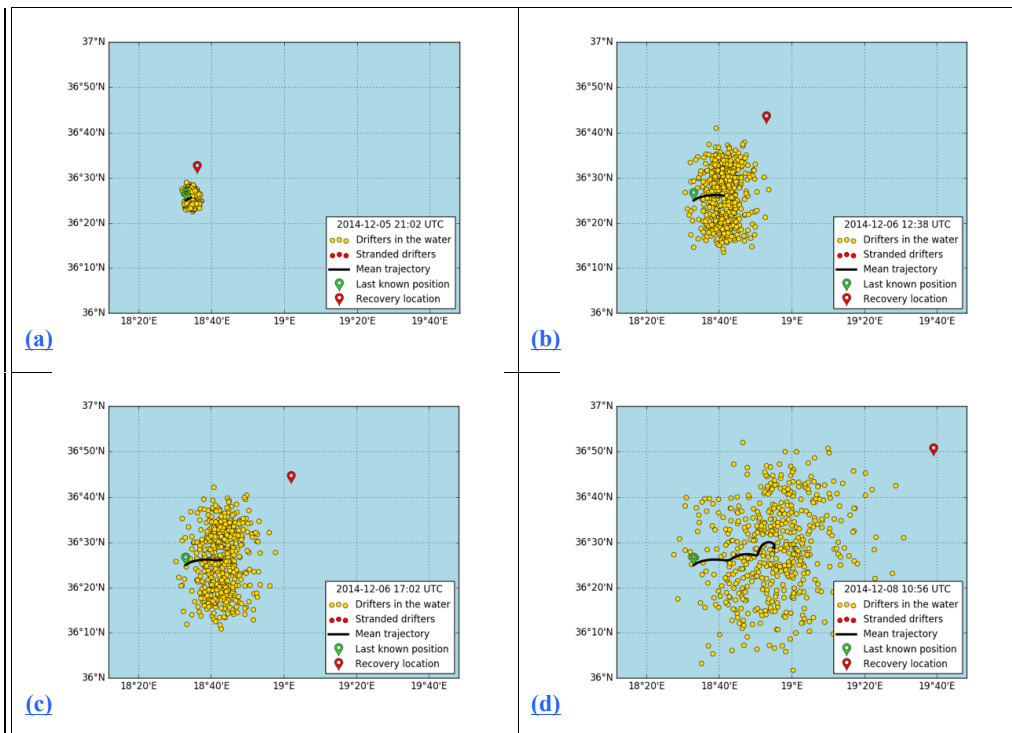

**Figure 13:** results of the “migrantship2” simulation done using OCEAN-SAR showing the positions (yellow points) of the particles (a) after 5 hours of simulation, (b) after 20 hours of simulation, (c) after 25 hours of simulation and (d) at the end of the simulation 10:57 UTC of 8<sup>th</sup> December 2014, after 66 hours. The red place-mark indicates the observed position of the ship at each time. The green place-mark represents the position in which the ship was found but when it was not possible to rescue. The black line shows the mean trajectory of the launched particles.

In the reconstruction of the migrantship2 (Figure 13) case the area identified by the simulated drifters does not include the final position of the ship, which drifted for almost 3 days (66 hours). The simulated drifters are moving towards the east, while the ship is faster and moves further north-westward.

CMCC CMCC 7/10/16 11:52

Eliminato: 131112

Eric Jansen 5/10/16 14:48

Eliminato:

Eric Jansen 5/10/16 14:55

Eliminato: in which the ship was rescued

CMCC CMCC 7/10/16 11:52

Eliminato: Figure 13Figure 11Figure 12

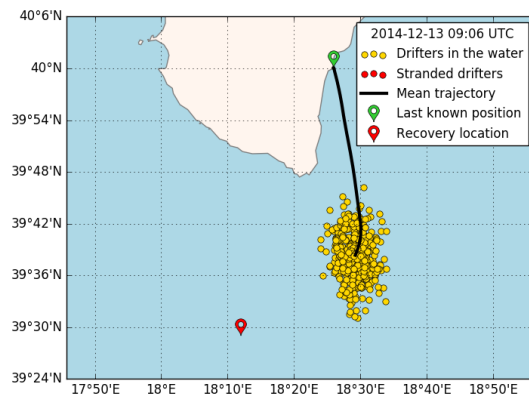

Figure 14: results of the “Small boat” simulation done using OCEAN-SAR showing the positions (yellow points) of the particles at the end of the simulation 09:05 UTC of 13<sup>th</sup> December 2014. The red place-mark indicates the position in which the boat was rescued. The green place-mark represents the last known position. The black line shows the mean trajectory of the simulated particles.

In the reconstruction of the Small boat case (Figure 14) the final position of the simulated drifters is not in agreement with the observation: the small boat drifted more south west and its final position after 15 hours at sea is outside the area identified by OCEAN-SAR system. OCEAN-SAR system predicted correctly a southward movement of the boat, but in reality the boat moved faster further westward. The westward position of the boat can also be explained by the fact that the person on the boat was paddling towards land and the Coast Guard explain that this was resulting on a westward movement of the boat.

CMCC CMCC 7/10/16 11:52

Eliminato: 1413

CMCC CMCC 7/10/16 11:52

Eliminato: Figure 14Figure 12Figure 13

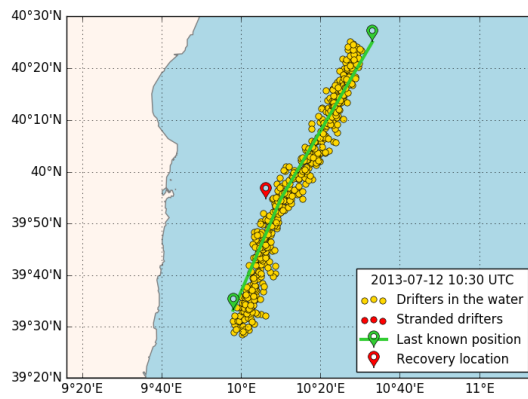

**Figure 15:** results of the ‘Ferry’ simulation done using OCEAN-SAR showing the positions (yellow points) of the particles at the end of the simulation 10:30 UTC of 7<sup>th</sup> December 2012. The red place-mark indicates the position in which the person was found at sea after 14 hours from the last time he was seen on board of the ferry. The green segments represent the route of the ferry along which the particles have been simulated.

In the reconstruction of the ‘Ferry’ case (Figure 15) the final position of the simulated drifters is in partial agreement with the observed location of the body found at sea after 13 hours of drifting. The real position is few hundred meters westward from the OCEAN-SAR area.

OCEAN-SAR was used already several time by Italian Coast Guards in real case actions of emergency related to SAR. In this paper we present the case of a diver lost in Monopoli, which body was found few hours later (Figure 16). The OCEAN-SAR simulation results are in good agreement with the real drift of the body.

CMCC CMCC 7/10/16 11:52

Eliminato: 151314

CMCC CMCC 7/10/16 11:52

Eliminato: Figure 15Figure 13Figure 14

CMCC CMCC 7/10/16 11:52

Eliminato: Figure 16Figure 14Figure 14Figure 15

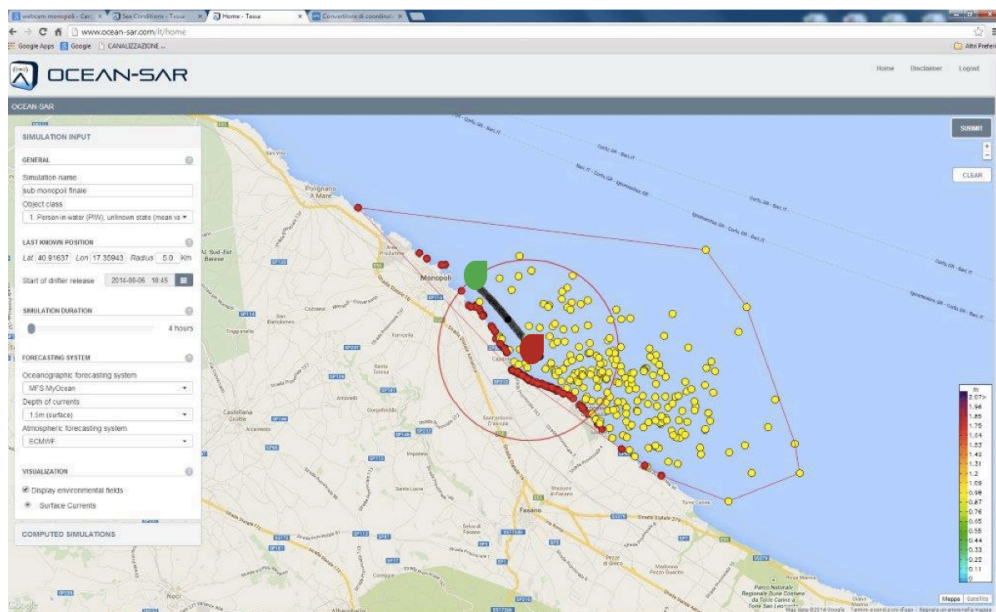

**Figure 16:** results of the real case scenario called MONOPOLI, simulation done using OCEAN-SAR showing the positions (yellow points and red points on the coast) of the particles at the end of the simulation 14:45 UTC of 6<sup>th</sup> August 2014. The large red place-mark indicates the position in which the person was found at sea after 4 hours. The green point represents the last known position at which the diver was lost at 10:45 UTC of the 6<sup>th</sup> August 2014.

CMCC CMCC 7/10/16 11:52  
Eliminato: 1615

## 6. Conclusions

OCEAN-SAR is an operational decision support system, based on the Leeway model and implemented as a complete system for on-demand simulation of drifting objects at sea. It uses as input ocean currents and wind data forecasts from third party providers that are dynamically prepared. The DSS is freely available on the web and for mobile devices.

The interaction with the users and the participation of authors from Italian Coast Guard to the co-design and testing of the OCEAN-SAR allowed the customization of the service towards the users' needs and requirements.

The experience of OCEAN-SAR highlights that research and development activities, in the our case ocean and Lagrangian modelling, should as much as possible aim to converge towards operational applications so that their results and finding are tested in operational mode and in real case scenarios by the users, often situations in which weak components of the systems and bugs are highlighted. The operational testing also helps to demonstrate the effectiveness and importance of research results for supporting societal challenges and in our case the benefit for maritime safety and for saving life at sea. As possible future improvements to OCEAN-SAR we foresee the use of the high-resolution sub-regional and coastal operational models for currents and wind forecasts, especially in coastal areas, and the implementation of an Application Programming Interface (API) layer which will allow users to interface their own software tools with OCEAN-SAR, the further testing by users and the integration with users' software already existing and in use for the managing of SAR emergency at sea. Validation of SAR trajectory model using actual SAR cases as done in this paper is important especially from the users point of view but have some limitations: 1) In some cases there is large uncertainty on the LKP; 2) In some cases we can not be sure that the correct or most appropriate search object are selected and used; 3) Since there would not be any measurement of currents and wind at the time and location of the event modelers need to consider that there might be large uncertainties in the winds and currents estimated by the model.

## 20 Acknowledgments

This work was performed in the framework of the TESSA Project PON01\_02823 supported by PON Ricerca & Competitività 2007-2013 cofunded by UE (Fondo Europeo di sviluppo regionale), MIUR (Ministero Italiano dell'Università e della Ricerca), and MSE (Ministero dello Sviluppo Economico). We thank Copernicus Marine Environment Monitoring Service - CMEMS MED-MFC for the provision of the ocean forecasting products, Servizio Meteorologico Aeronautica Militare Italiano for the provision of the wind products and Italian Coast Guard, in the person of C.F. Sirio Faè, for the kind cooperation, important suggestions and for the provision of the data related to the real case scenarios used for testing OCEAN-SAR in this paper.

## References

- 30 A.A. Allen and J.V. Plourde, "Review of leeway: Field experiments and implementation", Tech. Rep. CG-D-08-99, U.S. Coast Guard Research and Development Center, 1999.  
A.A. Allen, "Leeway divergence", Tech. Rep. CG-D-05-05, U.S. Coast Guard Research and Development Center, 2005.  
Ø. Breivik and A.A. Allen, "An operational search and rescue model for the Norwegian sea and the  
35 North sea", J Marine Syst, vol. 69, pp. 99—113, Nov 2008.

CMCC CMCC 28/9/16 12:46

**Formattato:** Tipo di carattere:(Predefinito)  
Times New Roman, 12 pt, Non Grassetto,  
Colore carattere: Automatico, Inglese  
(Stati Uniti)

- De Dominicis, M., Pinardi, N., Zodiatis, G., and Lardner, R.: MEDSLIK-II, a Lagrangian marine surface oil spill model for short-term forecasting – Part I: Theory, *Geosci. Model Dev.*, 6, 1851-1869, 2013.
- 5 Dobricic, S. and N. Pinardi, 2008. An oceanographic three-dimensional variational data assimilation scheme. *Ocean Modelling*, 22, 3-4, 89-105.
- Dobricic, S., N. Pinardi, M. Adani, M. Tonani, C. Fratianni, A. Bonazzi, and V. Fernandez, 2007. Daily oceanographic analyses by Mediterranean Forecasting System at the basin scale. *Ocean Sci.*, 3, 149-157.
- 10 IMO, 2016. IAMSAR Manual 2016 Edition. Volume I ISBN: 978-92-801-1639-7; Volume II ISBN: 978-92-801-1640-3; Volume III ISBN: 978-92-801-1641-0.
- Mannarini, G., Pinardi, N., Coppini, G., Oddo, P., and Iafrafi, A.: VISIR-I: small vessels – least-time nautical routes using wave forecasts, *Geosci. Model Dev.*, 9, 1597-1625, doi:10.5194/gmd-9-1597-2016, 2016.
- 15 Oddo P., M. Adani N. Pinardi, C. Fratianni, M. Tonani, D. Pettenuzzo, 2009. A Nested Atlantic-Mediterranean Sea General Circulation Model for Operational Forecasting. *Ocean Sci. Discuss.*, 6, 1093-1127.
- Tonani, M., N. Pinardi, S. Dobricic, I. Pujol, and C. Fratianni, 2008. “A high-resolution free-surface model of the Mediterranean Sea”. *Ocean Sci.*, 4, 1-14.
- 20 Tonani M., N. Pinardi, C. Fratianni, J. Pistoia, S. Dobricic, S. Pensieri, M. de Alfonso and K. Nittis, 2009. Mediterranean Forecasting System: forecast and analysis assessment through skill score, *Ocean Sci.*, 5, 649-660.
- G. Mannarini, G. Turrise, A. D’Anca, M. Scalas, N. Pinardi, G. Coppini, F. Palermo, I. Carluccio, M. Scuro, S. Creti, R. Lecci, P. Nassisi, and L. Tedesco, 2016 “VISIR: Technological infrastructure of an operational service for safe and efficient navigation in the Mediterranean Sea”. *Nat. Hazards Earth Syst. Sci. Discuss.*, doi:10.5194/nhess-2016-32, 2016
- 25
- 30

## Appendix 1: Description of user –defined parameters for the SAR DSS

To start the Leeway simulation a string of input arguments from the CDAM is created that contains the full set of user-defined parameters introduced via the web UI. The set of parameters is listed in Table 2

35

| # | Name | Description | Format | Default | Units |
|---|------|-------------|--------|---------|-------|
|---|------|-------------|--------|---------|-------|

Microsoft Office User 4/10/16 09:00

**Formattato:** Tipo di carattere:12 pt, Non Grassetto, Colore carattere: Automatico, Inglese (Stati Uniti)

Microsoft Office User 4/10/16 09:00

**Formattato:** Tipo di carattere:12 pt, Non Grassetto, Colore carattere: Automatico, Inglese (Stati Uniti)

Microsoft Office User 4/10/16 09:00

**Formattato:** Tipo di carattere:12 pt

Microsoft Office User 4/10/16 08:59

**Eliminato:** -

Microsoft Office User 4/10/16 08:59

**Formattato:** Tipo di carattere:Times New Roman

Eric Jansen 5/10/16 15:18

**Tabella formattata**

Eric Jansen 5/10/16 15:06

**Eliminato:** : Default values



|    |                 |                                  |          | value |                            |
|----|-----------------|----------------------------------|----------|-------|----------------------------|
| 1  | id              | Query Unique identifier          | Integer  |       | -                          |
| 2  | simulation_name | Name of the simulation           | Char     |       | -                          |
| 3  | object_class    | Class of the object in water     | Integer  | 1     | -                          |
| 4  | start_lat       | Start position, latitudes        | Float    |       | Degrees                    |
| 5  | start_lon       | Start position, longitudes       | Float    |       | Degrees                    |
| 6  | start_rad       | Start radius                     | Float    | 5.00  | Kilometres                 |
| 7  | start_time      | Start time of simulation/seeding | ISO-8601 |       | -                          |
| 8  | simulation_time | Duration of simulation           | Integer  | 24    | Hours                      |
| 9  | depth           | Depth of the currents            | Integer  | 1     | No unit/model level number |
| 10 | end_rad         | End radius                       | Float    | 5.00  | Kilometres                 |
| 11 | end_time        | End time of seeding              | ISO-8601 |       | -                          |
| 12 | end_lat         | End latitude in degrees          | Float    |       | Degrees                    |
| 13 | end_lon         | End longitude in degrees         | Float    |       | Degrees                    |

**Table 3 Description of user-defined parameters. The data are sorted according to Name of parameter as written in the input string, Description, Value type and Units.**

Eric Jansen 5/10/16 15:17

Eliminato: number: > 0

Eric Jansen 5/10/16 15:07

Eliminato: : no default value

Eric Jansen 5/10/16 15:17

Eliminato: number: 1

Eric Jansen 5/10/16 15:07

Eliminato: : no default value

Eric Jansen 5/10/16 15:07

Eliminato: : no default value

Eric Jansen 5/10/16 15:09

Eliminato: : 5.00

Eric Jansen 5/10/16 15:07

Eliminato: Meters

Eric Jansen 5/10/16 15:07

Eliminato: : 2014-04-14T10=00Z;

Eric Jansen 5/10/16 15:08

Eliminato: : 24

Eric Jansen 5/10/16 15:08

Eliminato: : 1

Eric Jansen 5/10/16 15:09

Eliminato: 10

Eric Jansen 5/10/16 15:13

Formattato

Eric Jansen 5/10/16 15:13

Formattato: Normale, Centrato

Eric Jansen 5/10/16 15:13

Eliminato: 1

Eric Jansen 5/10/16 15:09

Eliminato: eltd...nd\_lat=42;

Eric Jansen 5/10/16 15:11

Eliminato: Integer...loat: 42

Eric Jansen 5/10/16 15:10

Eliminato: 12

Eric Jansen 5/10/16 15:10

Eliminato: elnd...nd\_lon=11;

Eric Jansen 5/10/16 15:11

Eliminato: Integer...loat: 11

Eric Jansen 5/10/16 15:15

Eliminato:
